# Supplementary material
Source: Springer Nature journal article supplement (https://www.springermedizin.de/resource/supplementary/12936_2011_2001_MOESM10_ESM.pdf/9543102)
Supplement: MOESM10 [file 9543102]

**Table 2.** Comparisons of the major alleles encountered in the Malawi consecutive patient data set in one season (n = 112) compared with the same allele for the set of global parasites previously published (n = 114). Thirteen assays are significantly different from the population observed in the original study with the differences ranging from 9.1 to 41.0%. Assay 24 is non-informative in the Malawi population.

| <b>Assay</b> | <b>Malawi</b> | <b>Original</b> | <b>Difference</b> | <b>z-score</b> | <b>p-value</b> |
|--------------|---------------|-----------------|-------------------|----------------|----------------|
| 1            | 0.6446        | 0.8690          | 0.2244            | -7.1029        | <0.05          |
| 2            | 0.9099        | 0.8475          | 0.0625            | 1.8546         | NS             |
| 3            | 0.6591        | 0.6885          | 0.0294            | -0.6786        | NS             |
| 4            | 0.8182        | 0.6446          | 0.1736            | 3.8716         | <0.05          |
| 5            | 0.7653        | 0.7698          | 0.0045            | -0.1150        | NS             |
| 6            | 0.6269        | 0.6154          | 0.0115            | 0.2520         | NS             |
| 7            | 0.6270        | 0.4640          | 0.1630            | 3.4894         | <0.05          |
| 8            | 0.8130        | 0.8034          | 0.0096            | 0.2576         | NS             |
| 9            | 0.7481        | 0.5873          | 0.1608            | 3.4871         | <0.05          |
| 10           | 0.6391        | 0.6111          | 0.0280            | 0.6130         | NS             |
| 11           | 0.6529        | 0.3220          | 0.3309            | 7.5603         | <0.05          |
| 12           | 0.5620        | 0.4274          | 0.1346            | 2.9058         | <0.05          |
| 13           | 0.6504        | 0.5289          | 0.1215            | 2.5985         | <0.05          |
| 14           | 0.7241        | 0.6239          | 0.1002            | 2.2087         | <0.05          |
| 15           | 0.5489        | 0.5124          | 0.0365            | 0.7791         | NS             |
| 16           | 0.7652        | 0.4872          | 0.2780            | 5.9392         | <0.05          |
| 17           | 0.5556        | 0.6032          | 0.0476            | -1.0392        | NS             |
| 18           | 0.6330        | 0.5124          | 0.1206            | 2.5768         | <0.05          |
| 19           | 0.5909        | 0.6250          | 0.0341            | -0.7519        | NS             |
| 20           | 0.6692        | 0.6230          | 0.0462            | 1.0183         | NS             |
| 21           | 0.5231        | 0.4318          | 0.0913            | 1.9671         | <0.05          |
| 22           | 0.5766        | 0.3953          | 0.1813            | 3.9591         | <0.05          |
| 23           | 0.6866        | 0.6518          | 0.0348            | 0.7795         | NS             |
| 24           | 0.9231        | 0.5897          | 0.3333            | 7.2356         | <0.05          |
